# Supplementary material
Source: PubMed Central journal article supplement (PMC4102656)
Supplement: NIHMS590667-supplement-Supplemental_Material.pdf [file NIHMS590667-supplement-Supplemental_Material.pdf]

## **SUPPLEMENTAL MATERIAL**

## Metabolomic analysis of pressure-overloaded and infarcted mouse hearts

\*Brian E. Sansbury, Ph.D.<sup>1,2,4</sup>, \*Angelica M. De Martino, B.S.<sup>1,4</sup>, \*Zhengzhi Xie, Ph.D.<sup>1,2</sup>, \*Alan C. Brooks, Ph.D.<sup>1,2,3</sup>, Robert E. Brainard, Ph.D.<sup>1,4</sup>, Lewis J. Watson, Ph.D.<sup>1,4</sup>, Andrew P. DeFilippis, M.D.<sup>1,6</sup>, Timothy D. Cummins, Ph.D.<sup>2</sup>, Matthew A. Harbeson<sup>2</sup>, Kenneth R. Brittain B.S.<sup>1,2</sup>, Sumanth D. Prabhu, M.D.<sup>5</sup>, Aruni Bhatnagar, Ph.D.<sup>1,2,3,4</sup>, Steven P. Jones, Ph.D.<sup>1,2,4</sup>, and Bradford G. Hill, Ph.D.<sup>1,2,3,4</sup>

<sup>1</sup>Institute of Molecular Cardiology, Division of Cardiology, Department of Medicine, <sup>2</sup>Diabetes and Obesity Center, <sup>3</sup>Department of Biochemistry and Molecular Biology, <sup>4</sup>Department of Physiology and Biophysics, University of Louisville, Louisville, KY, <sup>5</sup>Division of Cardiovascular Disease, University of Alabama at Birmingham, and Birmingham VAMC, Birmingham, AL, <sup>6</sup>Johns Hopkins University, Department of Medicine, Baltimore, MD

*\*indicates equal contribution by authors*

### **Table of Contents**

- A. Detailed Methods**
- B. Supplementary References**
- C. Supplementary Figures**
- D. Supplementary Tables**

Note: Supplementary Table III (raw data file, tab 1; metabolite information, tab 2; lactate/pyruvate ratio data, tab 3) supplied as Microsoft Excel File

### **A. Detailed Methods**

**Echocardiographic Assessment:** Transthoracic echocardiography of the left ventricle was performed as previously described<sup>1</sup> with adjustments for the Vevo 770 echocardiography machine. Body temperature was maintained (36.5°C-37.5°C) using a rectal thermometer interfaced with a servo-controlled heat lamp. Mice (C57BL/6J) were anesthetized with 2% isoflurane, maintained under anesthesia with 1.5% isoflurane, and examined. The mouse was placed chest up on an examination board interfaced with the Vevo 770. Next, depilatory cream

was applied to the mouse's chest and wiped clean to remove all hair in the area of interest. The 707-B (30 MHz) scan head was used to obtain 2D images of the parasternal long axis. M-modes were taken from the same image windows. The probe was then rotated to acquire a short axis view of the heart. Beginning at the level of the papillary muscles and moving apically, serial 2D images were taken every millimeter. Diastolic and systolic volumes were acquired by applying Simpson's rule of discs to the serially acquired short axis images. Stroke volume (SV) was calculated as: Diastolic volume - Systolic Volume. Ejection Fraction was calculated as:  $(SV/Diastolic\ Volume)*100\%$ . Cardiac output was determined by:  $SV*HR$ . All measurements were taken by utilizing the Vevo 770's rail system to maintain probe placement and allow for precise adjustments of position. Left ventricular diameters during diastole (LVIDd) and left ventricular diameter during systole (LVIDs) and heart rate (HR) were determined from long axis M-modes. Left ventricular fractional shortening (%FS) was calculated as:  $((LVIDd-LVIDs)/LVIDd)*100\%$ . Relative wall thickness was calculated as  $(diastolic\ posterior\ wall\ thickness + diastolic\ anterior\ wall\ thickness)/LVIDd$ . Velocity of circumferential shortening corrected for heart rate (Vcfc) was calculated as  $((FS/ET)/\sqrt{RR})$ .

**Transverse Aortic Constriction (TAC) surgery:** The TAC surgery was conducted in 2.75–3.25-month-old, male C57BL/6J mice by constriction of the transverse aorta as described<sup>2,3</sup> and in accordance with the University of Louisville Animal Care and Use Committee. Briefly, C57BL/6J mice were anesthetized with ketamine (50 mg/kg, intra-peritoneal) and pentobarbital (50 mg/kg, intra-peritoneal), orally intubated with polyethylene-60 tubing, and ventilated (Harvard Apparatus Rodent Ventilator, model 845) with oxygen supplementation. The aorta was visualized through an intercostal incision and a 7-0 nylon suture was looped around the aorta between the brachiocephalic and left common carotid arteries. The suture was tied around a 27-gauge needle (put adjacent to the aorta) to constrict the aorta to a reproducible diameter; the needle was removed, leaving a discrete region of stenosis (TAC mice), and the chest was

closed. Mice were extubated upon recovery of spontaneous breathing and were allowed to recover in warm, clean cages supplemented with oxygen. Analgesia (ketoprofen, 5 mg/kg, subcutaneous) was given before mice recovered from anesthesia (and by 24 and 48 hours later). Sham age-matched mice were subjected to the same procedure except the suture was only passed underneath the aorta and not tied off.

**Myocardial Infarction Studies:** Adult (4.25-month-old) male C57BL/6J mice were subjected to nonreperfused, *in vivo* coronary ligation to induce heart failure, as described previously<sup>1, 4-6</sup> and in accordance with the University of Louisville Animal Care and Use Committee. Using sterile technique, mice were subjected to a thoracotomy and the left coronary artery visualized and permanently occluded with 7-0 silk suture with the aid of a dissecting microscope. After ligation, the chest and skin were closed using 4-0 silk and polyester sutures respectively. Upon recovery of spontaneous respiration, the intubation tube was removed and mice were allowed to recover in a temperature-controlled area supplemented with 100% oxygen.

**Sample preparation for metabolomic analysis:** Upon sacrifice, hearts were washed for 5 s in ice-cold PBS to remove excess blood (and metabolites therein) and then snap-frozen in liquid nitrogen. At the time of analysis, sample metabolites were extracted with methanol. A recovery standard was introduced at the beginning of the extraction process. The extracted samples were split into equal parts for analysis on the GC/MS and LC/MS/MS platforms. Also included were several technical replicate samples created from a homogeneous pool containing a small amount of all study samples. Samples were placed briefly on a TurboVap® (Zymark) to remove the organic solvent. Each sample was then frozen and dried under vacuum. Samples were then prepared for the appropriate instrument, either LC/MS or GC/MS.

**LC/MS:** The LC/MS portion of the platform was based on a Waters ACQUITY UPLC and a Thermo-Finnigan LTQ mass spectrometer, which consisted of an electrospray ionization (ESI)

source and linear ion-trap (LIT) mass analyzer. The sample extract was split into two aliquots, dried, then reconstituted in acidic or basic LC-compatible solvents, each of which contained 11 or more injection standards at fixed concentrations. One aliquot was analyzed using acidic positive ion optimized conditions and the other using basic negative ion optimized conditions in two independent injections using separate dedicated columns. Extracts reconstituted in acidic conditions were gradient eluted using water and methanol both containing 0.1% formic acid, while the basic extracts, which also used water/methanol, contained 6.5 mM ammonium bicarbonate. The MS analysis alternated between MS and data-dependent MS<sup>2</sup> scans using dynamic exclusion.

**GC/MS:** In addition to the LIT front end, the LC/MS portion of the platform had a Fourier transform ion cyclotron resonance (FT-ICR) mass spectrometer backend. For ions with counts greater than 2 million, an accurate mass measurement could be performed. Accurate mass measurements could be made on the parent ion as well as fragments. The typical mass error was less than 5 ppm. Fragmentation spectra (MS/MS) were typically generated in data-dependent manner, but if necessary, targeted MS/MS was employed, such as in the case of lower level signals.

The samples destined for GC/MS analysis were re-dried under vacuum desiccation for a minimum of 24 h prior to being derivatized under dried nitrogen using bistrimethyl-silyl-trifluoroacetamide (BSTFA). The GC column was 5% phenyl and the temperature ramp is from 40° to 300° C in a 16 min period. Samples were analyzed on a Thermo-Finnigan Trace DSQ fast-scanning single-quadrupole mass spectrometer using electron impact ionization. The instrument was tuned and calibrated for mass resolution and mass accuracy on a daily basis. The information output from the raw data files was automatically extracted as discussed below.

Absolute values of BCAAs, polyamines, and prolylhydroxyproline were measured in mouse hearts and plasma samples by GC/MS using EZ:Faast GCMS Physiological amino acid analysis kit (Phenomenex KG0-7166) according to manufacturer's instructions and the literature<sup>7, 8</sup>. Internal standards used for these assays include: 1,4-butane-d8-diamine (10  $\mu$ M), spermidine-(butane-d8) (10  $\mu$ M), 3,4-dehydro-L-proline (10  $\mu$ M), and L-norvaline (100  $\mu$ M). Mouse heart samples were pulverized under liquid nitrogen, and ~25 mg powder was homogenized in a 10 $\times$  volume (w/v) of 0.2 M perchloric acid, along with internal standards. The suspension was sonicated in an ultrasonic bath for 30 min at 25°C, and centrifuged at 16,000 $\times$ g at 4°C for 20 min. The supernatant was then transferred to a clean tube and centrifuged again under the same conditions. Then, 200  $\mu$ l of the supernatant from heart was used for analysis. For plasma, 200  $\mu$ l of each plasma sample was used, as suggested by the manufacturer (Phenomenex KG0-7166).

**QA/QC:** A data normalization step was performed to correct variation resulting from instrument inter-day tuning differences. Each compound was corrected in run-day blocks by registering the medians to equal one (1.00) and normalizing each data point proportionately (block correction). Instrument variability was determined by calculating the median relative standard deviation (RSD) for the internal standards that were added to each sample prior to injection into the mass spectrometers. Process variability was determined by calculating the median RSD for all endogenous metabolites (i.e., non-instrument standards) present in 100% of the samples, which are technical replicates of pooled samples. Values for instrument and total process variability were 5% for internal standards and 15% for endogenous biochemicals, respectively. For QA/QC purposes, additional samples were included with each day's analysis. Furthermore, a selection of QC compounds was added to every sample, including those under test. These compounds were carefully chosen so as not to interfere with measurement of the endogenous compounds.

**Metabolite identification:** The 288 metabolites measured included known compounds detectable by the Metabolon GC or LC/MS platforms. Compounds were identified by comparison to library entries of purified standards. The combination of chromatographic properties and mass spectra gave an indication of a match to the specific compound or an isobaric entity, and the Metabolon Laboratory Information Management System (LIMS) was used for determining such analytical characteristics of metabolites. At the time of analysis, more than 1000 commercially available purified standard compounds had been registered into LIMS.

A variety of curation procedures were carried out to ensure that a high quality data set was made available for statistical analysis and data interpretation. The QC and curation processes were designed to ensure accurate and consistent identification of true chemical entities, and to remove those representing system artifacts, mis-assignments, and background noise. Visualization and interpretation software were used to confirm the consistency of peak identification among the various samples. Library matches for each compound were checked for each sample and corrected if necessary.

The bioinformatics system consisted of four major components, the LIMS system, data extraction and peak-identification software, data processing tools for QC and compound identification, and a collection of information interpretation and visualization tools. The purpose of the LIMS system was to enable fully auditable laboratory automation through a secure, easy to use, and highly specialized system. The scope of the LIMS system encompasses sample accessioning, sample preparation and instrumental analysis and reporting and advanced data analysis. Some of the subsequent software systems were grounded in the LIMS data structures, which have been modified to leverage and interface with the Metabolon information extraction and data visualization systems, as well as other data analysis software such as Metaboanalyst (<http://www.metaboanalyst.ca/>)<sup>9, 10</sup>.

**Metabolomic analysis and additional statistical considerations:** For screening for significant changes in metabolites, missing values were imputed by replacing missing values with half of the minimum value in the original data or by imputing the minimum value after rescaling the median to 1. The latter of these imputation methods was used only for constructing z-score plots. To identify and remove variables that were unlikely to be of use when modeling the data, data filtering by interquartile range was performed<sup>11</sup>. The data were then quantile-normalized within replicates after log transformation. This step was performed to transform the intensity values so that the distribution is more Gaussian. Further univariate and multivariate testing was performed exactly as outlined by Xia et al.<sup>9, 10</sup>, using Metaboanalyst 2.0 software (<http://www.metaboanalyst.ca/>)<sup>9, 10, 12</sup>. Metabolic pathway analysis (MetPA) was performed as described previously<sup>13</sup>. Briefly, overrepresentation analysis was used for pathway enrichment analysis and relative between-ness centrality was used for topographical analysis. Data in Tables are expressed as mean  $\pm$  SEM. Multiple groups (TAC and sham) were compared using ANOVA in Metaboanalyst, followed by Bonferroni or Tukey post-tests. Unpaired t test (Metaboanalyst) was used for direct comparisons between MI and corresponding sham groups. A p value less than 0.05 was considered significant.

## B. Supplementary References

1. Watson LJ, Facundo HT, Ngoh GA, Ameen M, Brainard RE, Lemma KM, Long BW, Prabhu SD, Xuan YT, Jones SP. O-linked beta-n-acetylglucosamine transferase is indispensable in the failing heart. *Proc Natl Acad Sci U S A*. 2010;107:17797-17802
2. Arany Z, Novikov M, Chin S, Ma Y, Rosenzweig A, Spiegelman BM. Transverse aortic constriction leads to accelerated heart failure in mice lacking ppar-gamma coactivator 1alpha. *Proc Natl Acad Sci U S A*. 2006;103:10086-10091
3. Facundo HT, Brainard RE, Watson LJ, Ngoh GA, Hamid T, Prabhu SD, Jones SP. O-glcnaC signaling is essential for nfat-mediated transcriptional reprogramming during cardiomyocyte hypertrophy. *Am J Physiol Heart Circ Physiol*. 2012;302:H2122-2130
4. Jones SP, Lefer DJ. Cardioprotective actions of acute hmg-coa reductase inhibition in the setting of myocardial infarction. *Acta Physiol Scand*. 2001;173:139-143
5. Jones SP, Greer JJ, van Haperen R, Duncker DJ, de Crom R, Lefer DJ. Endothelial nitric oxide synthase overexpression attenuates congestive heart failure in mice. *Proc Natl Acad Sci U S A*. 2003;100:4891-4896



6. Jones SP, Greer JJ, Ware PD, Yang J, Walsh K, Lefer DJ. Deficiency of inos does not attenuate severe congestive heart failure in mice. *Am J Physiol Heart Circ Physiol*. 2005;288:H365-370
7. Badawy AA, Morgan CJ, Turner JA. Application of the phenomenon ez:Faasttrade mark amino acid analysis kit for rapid gas-chromatographic determination of concentrations of plasma tryptophan and its brain uptake competitors. *Amino Acids*. 2008;34:587-596
8. Lozanov V, Petrov S, Mitev V. Simultaneous analysis of amino acid and biogenic polyamines by high-performance liquid chromatography after pre-column derivatization with n-(9-fluorenylmethoxycarbonyloxy)succinimide. *Journal of chromatography. A*. 2004;1025:201-208
9. Xia J, Wishart DS. Web-based inference of biological patterns, functions and pathways from metabolomic data using metaboanalyst. *Nat Protoc*. 2011;6:743-760
10. Xia J, Wishart DS. Metabolomic data processing, analysis, and interpretation using metaboanalyst. *Curr Protoc Bioinformatics*. 2011;Chapter 14:Unit 14 10
11. Hackstadt AJ, Hess AM. Filtering for increased power for microarray data analysis. *BMC Bioinformatics*. 2009;10:11
12. Sansbury BE, Cummins TD, Tang Y, Hellmann J, Holden CR, Harbeson MA, Chen Y, Patel RP, Spite MR, Bhatnagar A, Hill BG. Overexpression of endothelial nitric oxide synthase prevents diet-induced obesity and regulates adipocyte phenotype. *Circ Res*. 2012
13. Xia J, Wishart DS. Metpa: A web-based metabolomics tool for pathway analysis and visualization. *Bioinformatics*. 2010;26:2342-2344

## Supplemental Figures

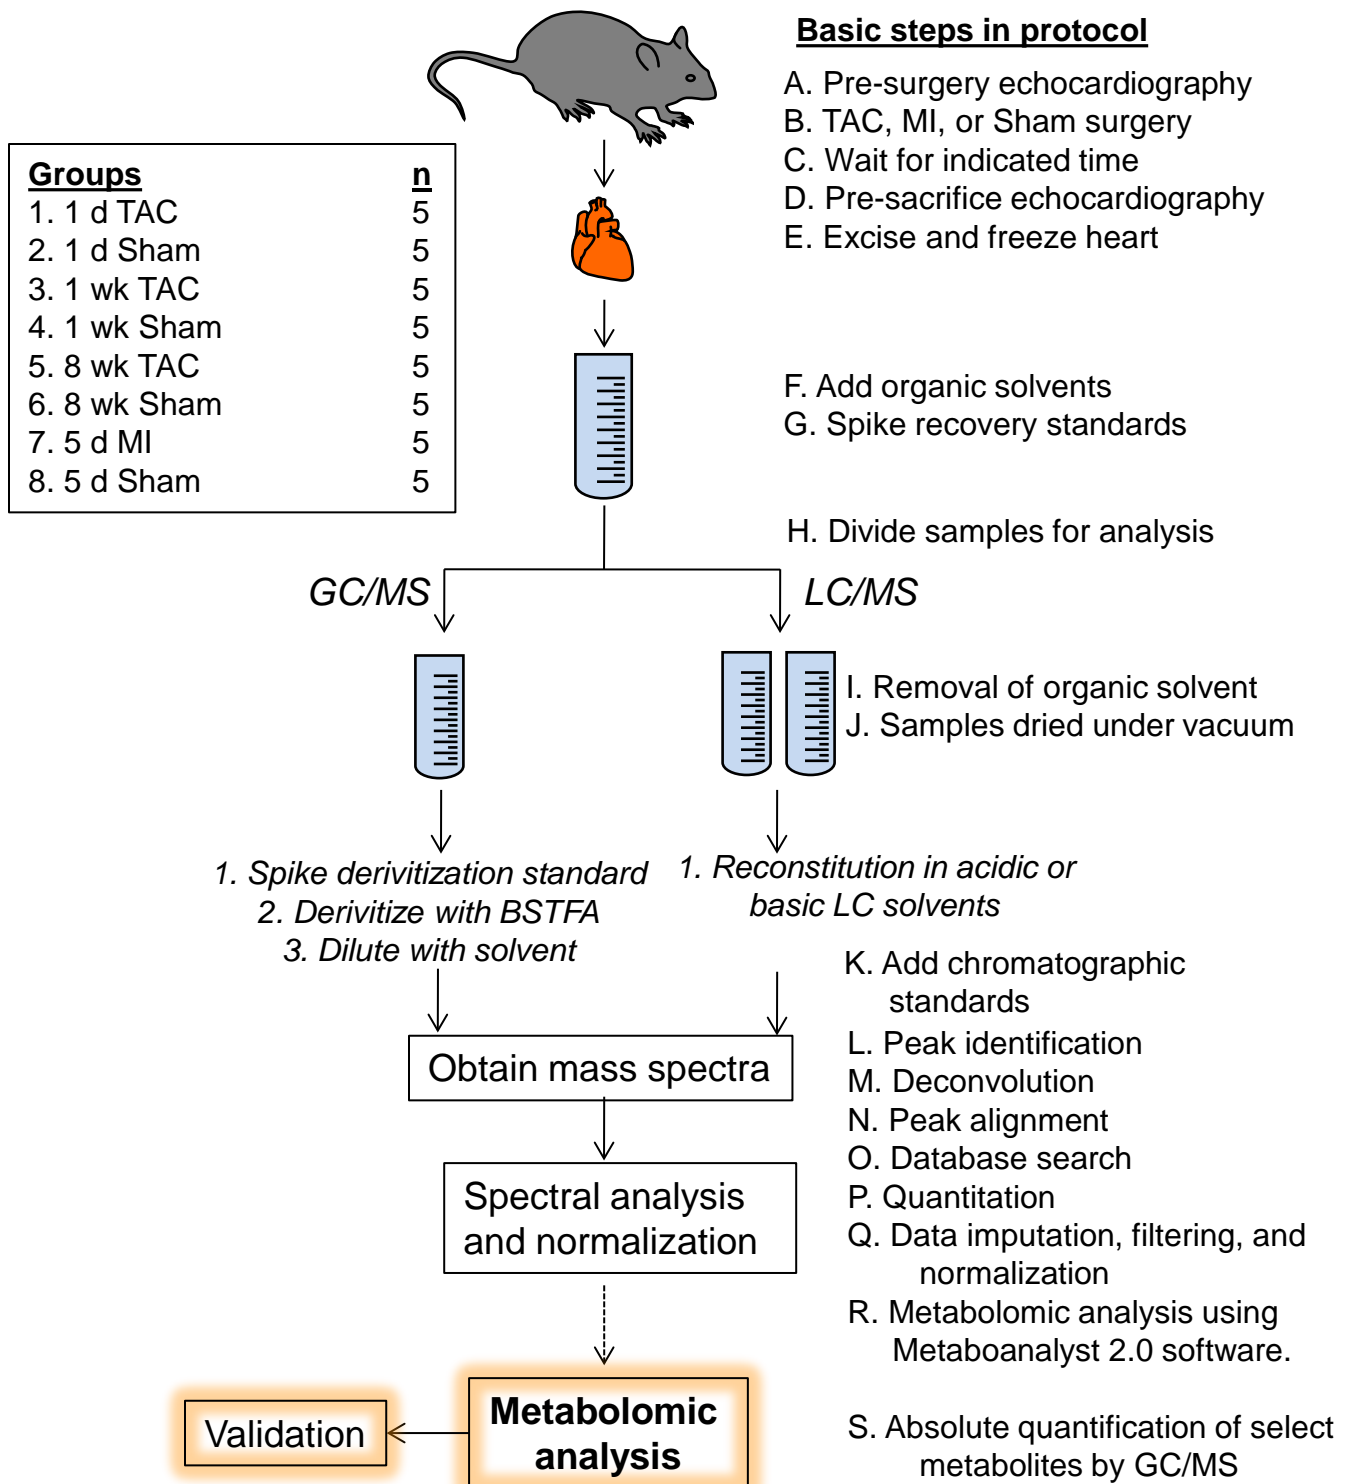

**Supplemental Fig. 1: Flow chart illustrating procedure for metabolomic profiling of heart tissue.** Mice were subjected to TAC or MI for the respective time, after a pre-surgery echo. For each group, there was a respective sham group. The heart was then procured, and metabolites were extracted. The samples were divided for GC/MS or LC/MS analysis. Following spectral analysis, the data were imputed, normalized, and analyzed using Metaboanalyst 2.0 software. Steps F–P were performed by Metabolon, Inc. The absolute abundance of certain metabolites, such as BCAAs, polyamines, and pro-hydroxy-pro, were then measured by GC/MS in subsequent groups of animals (validation, n = 10 – 13 per group).

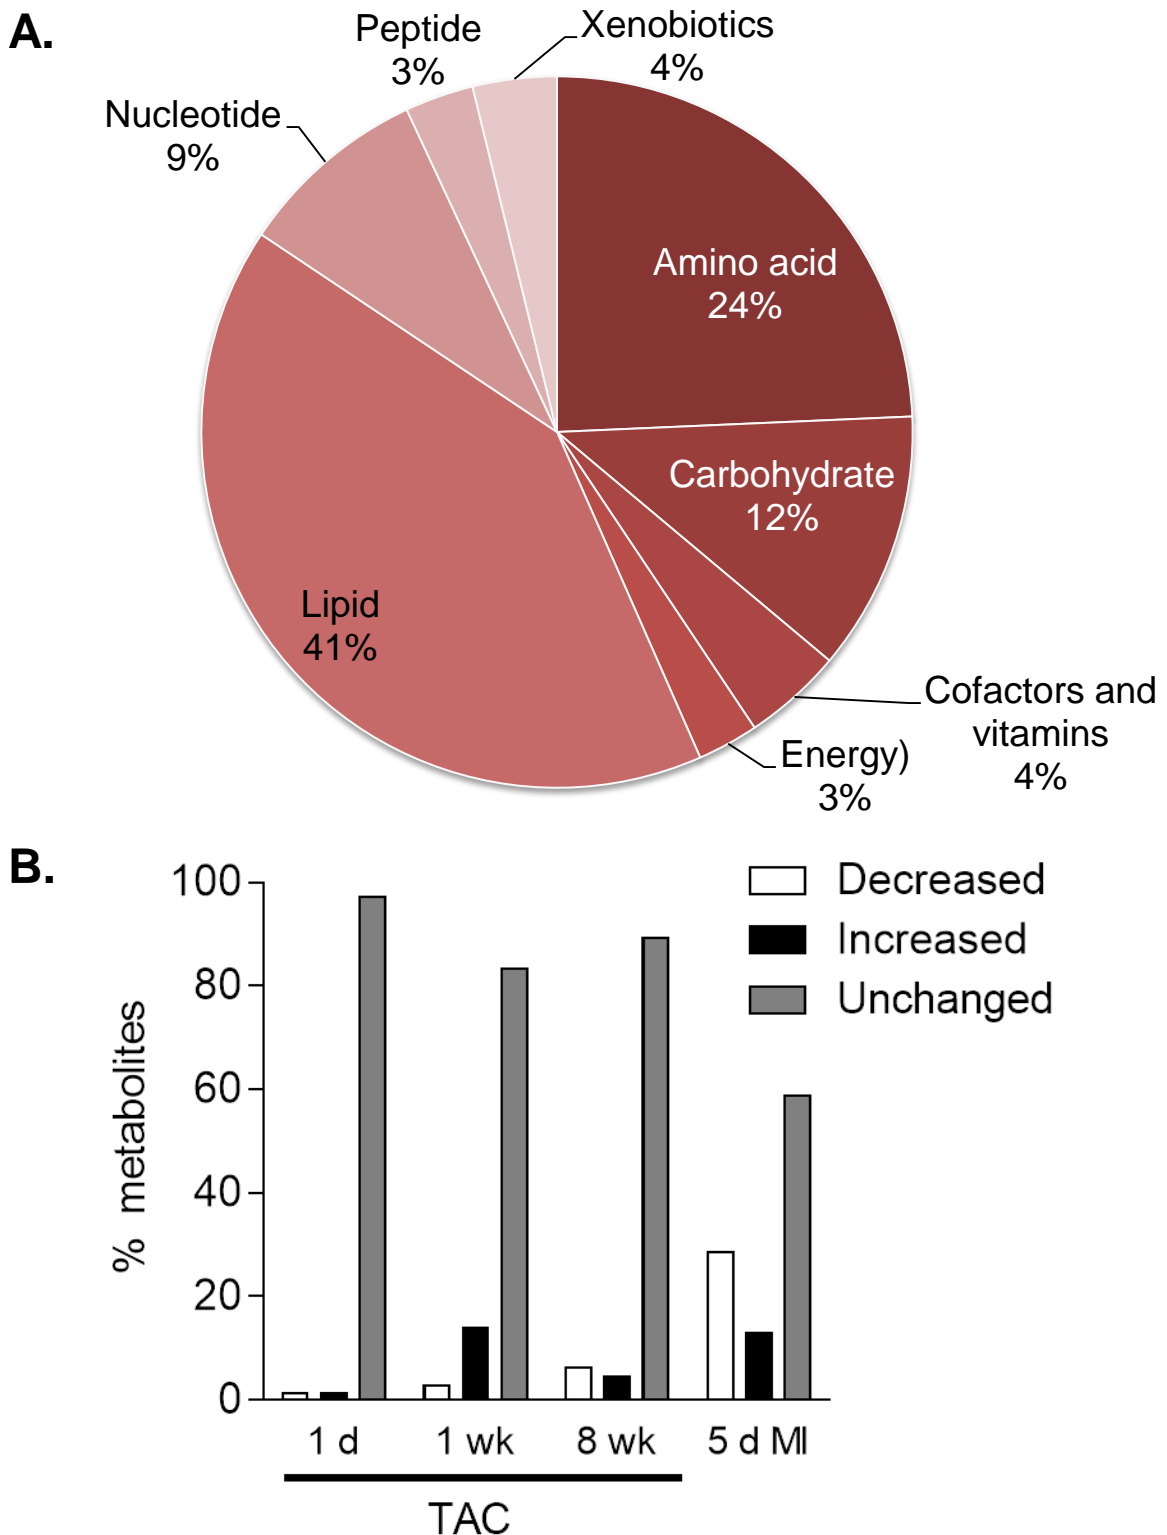

**Supplemental Fig. II: Metabolite distribution and directional changes in hearts subjected to TAC and MI.** (A) Class distribution of identified metabolites: Proportion of metabolites from each metabolite superfamily of those identified in the analysis. (B) Percentage of metabolites that changed at each time point after TAC or with MI compared to their respective Sham.  $n = 5$  animals per group

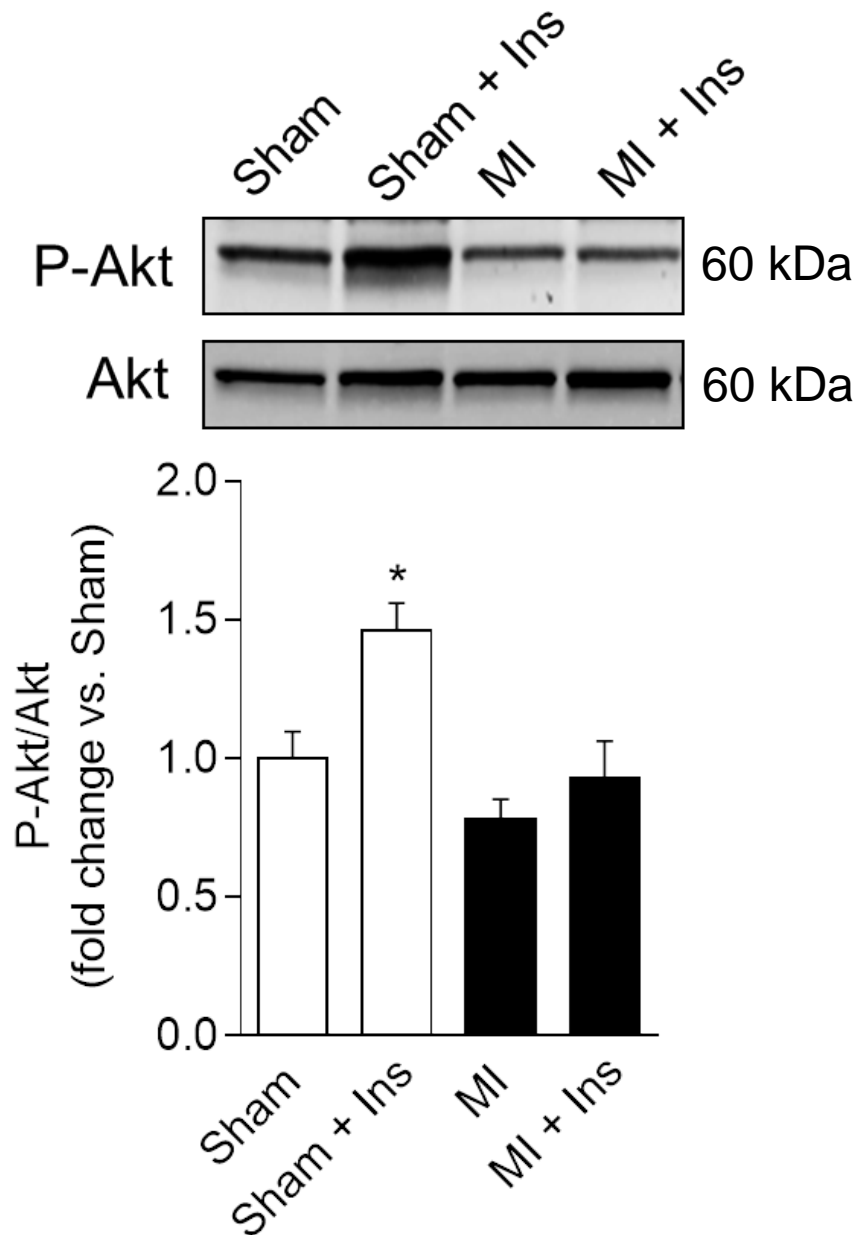

**Supplemental Fig. III. Heart failure induces myocardial insulin resistance.** Western blot analysis of phosphorylation of S473 of Akt in mouse hearts: Mice subjected to 5 d of permanent coronary ligation (MI) or sham surgery were administered insulin (1.5 U/kg in 0.9% saline, i.p.) 15 min prior to sacrifice.  $n = 10-16$  per group;  $*p < 0.05$  vs. Sham (One-way ANOVA with Tukey multiple comparison post test).

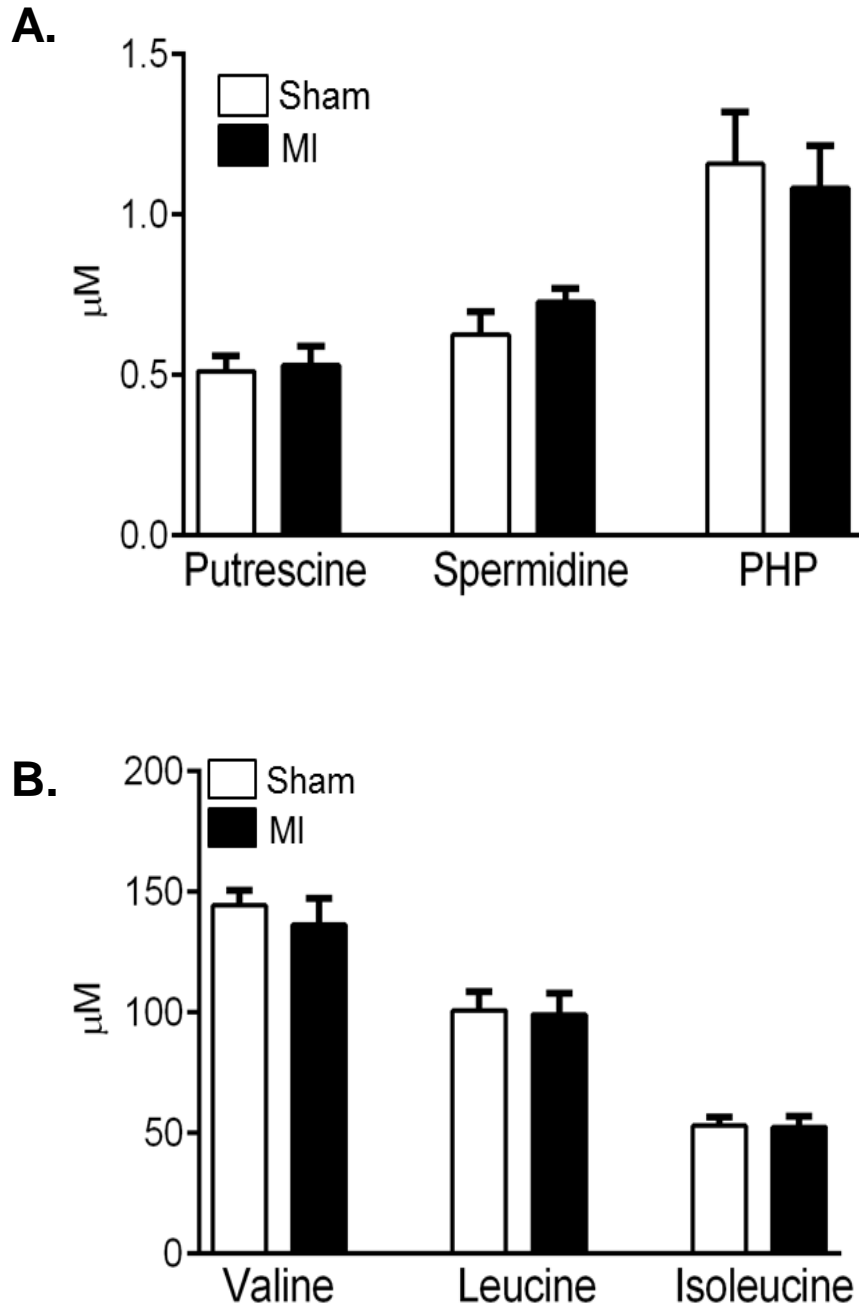

**Supplemental Fig. IV. Plasma levels of polyamines, prolylhydroxyproline (pro-hydroxy-pro; PHP), and BCAAs.** Mice were subjected to sham surgery or 5 d of MI and polyamines (putrescine and spermidine), PHP, and BCAAs were measured by GC/MS.  $n = 4-6$  per group,  $p > 0.05$  between Sham and MI.

**Supplemental Table I. List of myocardial metabolites that were significantly different between TAC and Sham groups.**

|                   | <i>Sub-pathway metabolism</i>                 | <i>Metabolite</i>            | <i>KEGG</i>    | <i>p-value</i> | <i>-log<sub>10</sub>(p)</i> | <i>FDR</i> | <i>1 d TAC<br/>1 d Sham</i> | <i>1 wk TAC<br/>1 wk Sham</i> | <i>8 wk TAC<br/>8 wk Sham</i> |
|-------------------|-----------------------------------------------|------------------------------|----------------|----------------|-----------------------------|------------|-----------------------------|-------------------------------|-------------------------------|
| <b>Amino Acid</b> | Alanine and aspartate metabolism              | aspartate                    | C00049         | 0.009381       | 2.0278                      | 0.063876   | 1.16±0.12                   | <b>1.51±0.05</b>              | 0.83±0.15                     |
|                   | Alanine and aspartate metabolism              | beta-alanine                 | C00099         | 0.014867       | 1.8278                      | 0.076595   | 0.81±0.03                   | <b>1.83±0.25</b>              | 1.20±0.16                     |
|                   | Cysteine, methionine, SAM, taurine metabolism | methionine                   | C00073         | 8.28E-05       | 4.0819                      | 0.006542   | 0.88±0.02                   | <b>1.62±0.19</b>              | <b>1.31±0.04</b>              |
|                   | Cysteine, methionine, SAM, taurine metabolism | hypotaurine                  | C00519         | 0.003038       | 2.5174                      | 0.035934   | 0.96±0.10                   | 2.25±0.71                     | 1.15±0.14                     |
|                   | Glutathione metabolism                        | glutathione, oxidized (GSSG) | C00127         | 0.000928       | 3.0326                      | 0.021989   | 0.90±0.04                   | <b>1.25±0.04</b>              | 1.13±0.05                     |
|                   | Glycine, serine and threonine metabolism      | betaine                      | C00719         | 0.000605       | 3.2186                      | 0.019538   | 0.76±0.02                   | 1.34±0.18                     | <b>1.56±0.12</b>              |
|                   | Glycine, serine and threonine metabolism      | threonine                    | C00188         | 0.008613       | 2.0649                      | 0.063876   | 1.05±0.07                   | <b>1.33±0.08</b>              | 0.85±0.10                     |
|                   | Glycine, serine and threonine metabolism      | homoserine                   | C00263, C02926 | 0.00884        | 2.0535                      | 0.063876   | 0.89±0.10                   | <b>1.30±0.06</b>              | 0.84±0.15                     |
|                   | Glycine, serine and threonine metabolism      | glycine                      | C00037         | 0.01755        | 1.7557                      | 0.081556   | 0.77±0.03                   | <b>1.41±0.10</b>              | 0.92±0.12                     |
|                   | Glycine, serine and threonine metabolism      | serine                       | C00065         | 0.022693       | 1.6441                      | 0.088542   | 0.94±0.07                   | <b>1.64±0.17</b>              | 0.96±0.15                     |
|                   | Lysine metabolism                             | lysine                       | C00047         | 0.009329       | 2.0302                      | 0.063876   | 0.73±0.02                   | <b>1.44±0.14</b>              | 0.70±0.17                     |
|                   | Lysine metabolism                             | pipecolate                   | C00408         | 0.019775       | 1.7039                      | 0.082927   | 1.46±0.24                   | 1.33±0.21                     | <b>1.39±0.14</b>              |
|                   | Phenylalanine & tyrosine                      | tyrosine                     | C00082         | 0.00309        | 2.5101                      | 0.035934   | 0.92±0.06                   | <b>1.35±0.10</b>              | 0.74±0.10                     |

|                                             |                                    |        |          |        |          |           |                  |                  |  |
|---------------------------------------------|------------------------------------|--------|----------|--------|----------|-----------|------------------|------------------|--|
| metabolism                                  |                                    |        |          |        |          |           |                  |                  |  |
| Phenylalanine & tyrosine metabolism         | phenylalanine                      | C00079 | 0.015291 | 1.8156 | 0.076703 | 0.85±0.04 | <b>1.31±0.06</b> | 0.88±0.12        |  |
| Polyamine metabolism                        | putrescine                         | C00134 | 7.48E-05 | 4.1264 | 0.006542 | 1.62±0.26 | 3.61±1.04        | <b>3.42±0.47</b> |  |
| Polyamine metabolism                        | spermidine                         | C00315 | 0.00066  | 3.1808 | 0.019538 | 0.94±0.05 | <b>1.27±0.08</b> | <b>1.48±0.12</b> |  |
| Polyamine metabolism                        | 5-methylthioadenosine (MTA)        | C00170 | 0.042072 | 1.376  | 0.12124  | 1.03±0.17 | 1.39±0.23        | 1.45±0.21        |  |
| Tryptophan metabolism                       | C-glycosyltryptophan               | -      | 0.000161 | 3.7935 | 0.009533 | 1.36±0.06 | <b>2.10±0.36</b> | <b>1.66±0.20</b> |  |
| Tryptophan metabolism                       | tryptophan                         | C00078 | 0.030268 | 1.519  | 0.10549  | 1.18±0.09 | <b>1.43±0.16</b> | 0.99±0.11        |  |
| Urea cycle; arginine-, proline-, metabolism | proline                            | C00148 | 0.003296 | 2.482  | 0.035934 | 0.97±0.04 | <b>1.54±0.19</b> | 1.05±0.10        |  |
| Urea cycle; arginine-, proline-, metabolism | assymetric dimethylarginine (ADMA) | C03626 | 0.003445 | 2.4628 | 0.035934 | 0.62±0.05 | <b>1.89±0.28</b> | 0.81±0.07        |  |
| Urea cycle; arginine-, proline-, metabolism | ornithine                          | C00077 | 0.021918 | 1.6592 | 0.088043 | 0.95±0.07 | 2.44±0.68        | 1.17±0.22        |  |
| Urea cycle; arginine-, proline-, metabolism | citrulline                         | C00327 | 0.035575 | 1.4489 | 0.1155   | 1.09±0.04 | 1.13±0.06        | 0.81±0.13        |  |
| Urea cycle; arginine-, proline-, metabolism | arginine                           | C00062 | 0.048724 | 1.3123 | 0.12831  | 0.99±0.24 | 1.58±0.34        | 1.00±0.24        |  |
| Valine, leucine and isoleucine metabolism   | isobutyrylcarnitine                | -      | 0.017118 | 1.7666 | 0.081556 | 1.11±0.16 | 0.72±0.16        | 0.86±0.13        |  |
| Valine, leucine                             | leucine                            | C00123 | 0.029147 | 1.5354 | 0.10376  | 0.74±0.04 | <b>1.25±0.03</b> | 0.83±0.13        |  |



|                                 |                                                                        |                                   |                        |          |          |          |           |                  |                  |
|---------------------------------|------------------------------------------------------------------------|-----------------------------------|------------------------|----------|----------|----------|-----------|------------------|------------------|
|                                 | and isoleucine metabolism<br>Valine, leucine and isoleucine metabolism | isoleucine                        | C00407                 | 0.043397 | 1.3625   | 0.12124  | 0.92±0.05 | <b>1.28±0.07</b> | 1.02±0.14        |
| <b>Carbohydrate</b>             | Glycolysis, gluconeogenesis, pyruvate metabolism                       | glycerate                         | C00258                 | 0.01729  | 1.7622   | 0.081556 | 0.93±0.03 | <b>0.73±0.06</b> | 0.75±0.13        |
|                                 | Glycolysis, gluconeogenesis, pyruvate metabolism                       | pyruvate                          | C00022                 | 0.022789 | 1.6423   | 0.088542 | 1.05±0.12 | 0.74±0.07        | <b>0.64±0.12</b> |
|                                 | Nucleotide sugars, pentose metabolism                                  | UDP-N-acetylglucosamine           | C00043                 | 0.043115 | 1.3654   | 0.12124  | 1.48±0.08 | 1.66±0.27        | 1.38±0.20        |
|                                 | Nucleotide sugars, pentose metabolism                                  | xylulose                          | C00310                 | 0.043646 | 1.3601   | 0.12124  | 0.91±0.06 | 1.02±0.15        | 0.76±0.38        |
|                                 | Nucleotide sugars, pentose metabolism                                  | ribose                            | C00121                 | 0.043677 | 1.3597   | 0.12124  | 0.96±0.05 | 1.10±0.11        | 0.67±0.32        |
|                                 | <b>Cofactors And Vitamins</b>                                          | Ascorbate and aldarate metabolism | glucarate (saccharate) | C00818   | 0.019614 | 1.7074   | 0.082927  | 1.24±0.37        | 2.82±0.78        |
| Pantothenate and CoA metabolism |                                                                        | pantothenate                      | C00864                 | 0.005268 | 2.2784   | 0.048018 | 1.40±0.18 | 0.96±0.08        | 0.74±0.10        |
| Pantothenate and CoA metabolism |                                                                        | phosphopantetheine                | C01134                 | 0.02761  | 1.5589   | 0.10313  | 1.12±0.05 | 0.95±0.12        | 0.87±0.21        |
| Riboflavin metabolism           |                                                                        | flavin adenine dinucleotide (FAD) | C00016                 | 0.007649 | 2.1164   | 0.062509 | 1.14±0.04 | 0.90±0.09        | <b>0.54±0.16</b> |
| <b>Energy</b>                   | Krebs cycle                                                            | succinylcarnitine                 |                        | 0.010815 | 1.966    | 0.067489 | 1.07±0.10 | 0.81±0.07        | 0.64±0.12        |

|                       |                           |                            |          |          |         |           |                  |                  |                  |
|-----------------------|---------------------------|----------------------------|----------|----------|---------|-----------|------------------|------------------|------------------|
|                       | Krebs cycle               | malate                     | C00149   | 0.028575 | 1.544   | 0.10376   | 1.08±0.03        | 1.00±0.05        | 0.75±0.10        |
| <b>Lipid</b>          | Carnitine metabolism      | 2-methylmalonyl carnitine  | -        | 0.0003   | 3.5229  | 0.014219  | 1.11±0.05        | 0.95±0.12        | <b>0.51±0.09</b> |
|                       | Carnitine metabolism      | oleoylcarnitine            | -        | 0.008229 | 2.0847  | 0.063876  | 1.60±0.41        | 1.07±0.28        | 0.55±0.27        |
|                       | Carnitine metabolism      | 3-dehydrocarnitine         | C02636   | 0.01428  | 1.8453  | 0.07521   | 0.77±0.07        | 0.90±0.11        | <b>0.57±0.10</b> |
|                       | Carnitine metabolism      | deoxycarnitine             | C01181   | 0.019147 | 1.7179  | 0.082927  | 0.97±0.07        | 1.37±0.21        | 1.12±0.05        |
|                       | Carnitine metabolism      | carnitine                  | C00487   | 0.043996 | 1.3566  | 0.12124   | 0.87±0.05        | 0.83±0.07        | 0.77±0.11        |
|                       | Fatty acid, dicarboxylate | 2-hydroxyglutarate         | C02630   | 0.002326 | 2.6335  | 0.030838  | 1.33±0.04        | 1.09±0.12        | <b>1.54±0.16</b> |
|                       | Fatty acid, monohydroxy   | 13-HODE + 9-HODE           | -        | 0.038989 | 1.4091  | 0.12124   | 0.76±0.10        | 0.82±0.11        | 0.74±0.30        |
|                       | Glycerolipid metabolism   | phosphoethanolamine        | C00346   | 0.012316 | 1.9095  | 0.0695    | 0.77±0.18        | <b>1.96±0.34</b> | <b>0.47±0.13</b> |
|                       | Glycerolipid metabolism   | choline                    | C00114   | 0.018509 | 1.7326  | 0.082768  | 0.89±0.03        | 1.07±0.04        | 0.82±0.07        |
|                       | Glycerolipid metabolism   | glycerol 3-phosphate (G3P) | C00093   | 0.042412 | 1.3725  | 0.12124   | 0.87±0.06        | 1.42±0.18        | 1.76±0.29        |
|                       | Inositol metabolism       | inositol 1-phosphate (I1P) | -        | 0.002273 | 2.6435  | 0.030838  | 0.70±0.03        | 1.26±0.11        | <b>0.48±0.11</b> |
|                       | Inositol metabolism       | myo-inositol               | C00137   | 0.047891 | 1.3197  | 0.12753   | <b>0.73±0.04</b> | 0.97±0.09        | 0.73±0.12        |
|                       | Long chain fatty acid     | nonadecanoate (19:0)       | C16535   | 0.021374 | 1.6701  | 0.087337  | 0.86±0.13        | 0.99±0.13        | <b>0.50±0.16</b> |
|                       | Long chain fatty acid     | margarate (17:0)           | -        | 0.027851 | 1.5552  | 0.10313   | 0.74±0.07        | 0.93±0.10        | 0.67±0.21        |
|                       | Long chain fatty acid     | 10-heptadecenoate (17:1n7) | -        | 0.029333 | 1.5326  | 0.10376   | 0.91±0.03        | 0.92±0.03        | 0.71±0.22        |
| Long chain fatty acid | arachidate (20:0)         | C06425                     | 0.034772 | 1.4588   | 0.1155  | 0.80±0.16 | 0.95±0.08        | <b>0.55±0.16</b> |                  |
| Long chain fatty acid | arachidonate (20:4n6)     | C00219                     | 0.040091 | 1.397    | 0.12124 | 0.83±0.07 | 1.26±0.17        | 0.66±0.24        |                  |

|              |                                             |                  |          |          |          |           |                  |                  |           |
|--------------|---------------------------------------------|------------------|----------|----------|----------|-----------|------------------|------------------|-----------|
|              | Long chain fatty acid                       | palmitate (16:0) | C00249   | 0.040488 | 1.3927   | 0.12124   | 0.89±0.05        | 1.07±0.06        | 0.72±0.17 |
| Lysolipid    | 1-heptadecanoylglycerophosphocholine        | -                | 0.000914 | 3.0391   | 0.021989 | 0.81±0.06 | 0.79±0.10        | <b>0.48±0.17</b> |           |
| Lysolipid    | 1-palmitoylglycerophosphocholine            | -                | 0.001118 | 2.9515   | 0.024092 | 0.92±0.02 | 0.93±0.06        | <b>0.50±0.19</b> |           |
| Lysolipid    | 1-palmitoylglycerophosphocholine            | -                | 0.001358 | 2.8672   | 0.024752 | 0.92±0.02 | 0.93±0.06        | 0.50±0.19        |           |
| Lysolipid    | 1-oleoylglycerophosphocholine               | -                | 0.003639 | 2.439    | 0.035934 | 0.82±0.02 | 0.95±0.10        | 0.52±0.25        |           |
| Lysolipid    | 1-pentadecanoylglycerophosphocholine        | -                | 0.006899 | 2.1612   | 0.058391 | 0.87±0.06 | <b>0.73±0.03</b> | 0.69±0.22        |           |
| Lysolipid    | 1-palmitoleoylglycerophosphocholine         | -                | 0.010759 | 1.9682   | 0.067489 | 0.75±0.04 | 0.78±0.09        | 0.85±0.35        |           |
| Lysolipid    | 2-oleoylglycerophosphocholine               | -                | 0.01362  | 1.8658   | 0.075066 | 0.90±0.05 | 1.09±0.12        | 0.56±0.26        |           |
| Lysolipid    | 2-docosahexaenoylglycerophosphocholine      | -                | 0.01422  | 1.8471   | 0.07521  | 1.03±0.06 | 1.06±0.06        | 0.59±0.17        |           |
| Lysolipid    | 1-stearoylglycerophosphoglycerol            | -                | 0.015535 | 1.8087   | 0.076703 | 1.38±0.23 | 1.02±0.12        | 1.09±0.43        |           |
| Lysolipid    | 1-docosapentaenoylglycerophosphocholine     | -                | 0.031127 | 1.5069   | 0.10691  | 0.69±0.12 | 1.05±0.17        | 0.85±0.26        |           |
| Lysolipid    | 2-docosahexaenoylglycerophosphoethanolamine | -                | 0.039019 | 1.4087   | 0.12124  | 1.02±0.06 | 1.06±0.06        | 0.59±0.17        |           |
| Lysolipid    | 2-docosapentaenoylglycerophosphocholine     | -                | 0.046267 | 1.3347   | 0.12461  | 0.84±0.10 | 1.08±0.17        | 0.50±0.20        |           |
| Sphingolipid | erythro-                                    | -                | 0.000534 | 3.2728   | 0.019538 | 1.04±0.07 | 0.68±0.12        | 0.69±0.13        |           |

|                                       |                                       |                                     |          |          |          |           |           |                  |                  |
|---------------------------------------|---------------------------------------|-------------------------------------|----------|----------|----------|-----------|-----------|------------------|------------------|
|                                       | sphingosylphosphorylcho               |                                     |          |          |          |           |           |                  |                  |
|                                       |                                       | line                                |          |          |          |           |           |                  |                  |
|                                       | Sphingolipid                          | sphingosine                         | C00319   | 0.002153 | 2.6669   | 0.030838  | 0.94±0.11 | 1.06±0.10        | <b>0.52±0.16</b> |
|                                       | Sphingolipid                          | stearoyl sphingomyelin              | C00550   | 0.002342 | 2.6304   | 0.030838  | 0.90±0.04 | 0.83±0.13        | <b>0.46±0.14</b> |
|                                       | Sphingolipid                          | sphinganine                         | C00836   | 0.041374 | 1.3833   | 0.12124   | 1.41±0.29 | 0.88±0.14        | 0.89±0.18        |
|                                       | Sterol/Steroid                        | 7-beta-hydroxycholesterol           | C03594   | 0.00354  | 2.451    | 0.035934  | 0.85±0.10 | 0.65±0.07        | 0.60±0.14        |
| <b>Nucleotide</b>                     | Purine metabolism, (hypo)xanthine/i   | inosine                             | C00294   | 0.011753 | 1.9299   | 0.0695    | 0.96±0.04 | 0.99±0.06        | 0.59±0.17        |
|                                       | nosine containing                     |                                     |          |          |          |           |           |                  |                  |
|                                       | Purine metabolism, (hypo)xanthine/i   | inosine 5'-monophosphate (IMP)      | C00130   | 0.03397  | 1.4689   | 0.11501   | 1.29±0.13 | 0.85±0.08        | <b>0.64±0.09</b> |
|                                       | nosine containing                     |                                     |          |          |          |           |           |                  |                  |
|                                       | Purine metabolism, (hypo)xanthine/i   | hypoxanthine                        | C00262   | 0.044582 | 1.3508   | 0.12145   | 1.06±0.03 | 1.19±0.06        | 0.85±0.08        |
|                                       | nosine containing                     |                                     |          |          |          |           |           |                  |                  |
|                                       | Purine metabolism, adenine containing | adenosine 3'-monophosphate (3'-AMP) | C01367   | 1.41E-05 | 4.8523   | 0.00333   | 0.97±0.05 | 1.04±0.05        | <b>0.44±0.11</b> |
|                                       | Purine metabolism, adenine containing | adenosine 3',5'-diphosphate         | C00054   | 0.001609 | 2.7936   | 0.027231  | 1.24±0.10 | <b>0.60±0.10</b> | <b>0.53±0.14</b> |
| Purine metabolism, adenine containing | adenosine 2'-monophosphate (2'-AMP)   | C00946                              | 0.009433 | 2.0253   | 0.063876 | 0.67±0.10 | 1.23±0.10 | 0.70±0.20        |                  |
| Purine metabolism, adenine containing | adenosine 5'-diphosphate (ADP)        | C00008                              | 0.018337 | 1.7367   | 0.082768 | 1.09±0.08 | 0.84±0.12 | 0.52±0.25        |                  |

|                    |                                            |                                    |        |          |        |          |           |                  |                  |
|--------------------|--------------------------------------------|------------------------------------|--------|----------|--------|----------|-----------|------------------|------------------|
|                    | Purine metabolism, guanine containing      | guanosine 5'-monophosphate (GMP)   | -      | 0.001319 | 2.8797 | 0.024752 | 1.23±0.05 | 1.08±0.06        | 1.10±0.08        |
|                    | Purine metabolism, guanine containing      | guanosine                          | C00387 | 0.025676 | 1.5905 | 0.09815  | 1.09±0.12 | 1.37±0.24        | 0.55±0.24        |
|                    | Pyrimidine metabolism, cytidine containing | cytidine                           | C00475 | 0.011    | 1.9586 | 0.067489 | 1.08±0.07 | <b>1.37±0.07</b> | 0.95±0.12        |
|                    | Pyrimidine metabolism, cytidine containing | cytidine 5'-monophosphate (5'-CMP) | C00055 | 0.035162 | 1.4539 | 0.1155   | 0.82±0.05 | 1.07±0.10        | 0.72±0.10        |
|                    | Pyrimidine metabolism, uracil containing   | uracil                             | C00106 | 0.011106 | 1.9544 | 0.067489 | 1.11±0.19 | <b>1.77±0.25</b> | 1.25±0.16        |
|                    | Pyrimidine metabolism, uracil containing   | uridine                            | C00299 | 0.012204 | 1.9135 | 0.0695   | 0.90±0.05 | 0.96±0.06        | <b>0.59±0.12</b> |
| <b>Xenobiotics</b> | Benzoate metabolism                        | 4-hydroxybenzoate                  | C00156 | 0.019944 | 1.7002 | 0.082927 | 0.82±0.11 | 1.45±0.31        | 0.85±0.20        |

Wild-type C57BL/6J mice were subjected to sham surgery or transverse aortic constriction (TAC) for 1 day (1 d), 1 week (1 wk), or 8 weeks (8 wk). Metabolites extracted from the hearts were then subjected to LC or GC mass spectrometric analysis. To eliminate potential bias imposed by data imputation, only those metabolites that had 3 or more samples represented in each sham and TAC group are listed above. Metabolites found to be significantly different by one-way ANOVA are shown; and in bold are those values found to be significantly different (i.e.,  $p < 0.05$ ) from the respective sham group via post-hoc  $t$ -tests. The  $-\log_{10}(p)$  value is the  $p$  value converted to the negative base 10 logarithm of the  $p$  value. The (-) indicates no current KEGG identification number.

**Supplemental Table II. List of myocardial metabolites that were significantly different between the MI and Sham groups.**

| <i>Super pathway</i>                      | <i>Sub-pathway metabolism</i>                 | <i>Metabolite</i>                  | <i>KEGG</i> | <i>p-value</i> | <i>-log<sub>10</sub>(p)</i> | <i>FDR</i> | <i>Fold change vs. Sham</i> |
|-------------------------------------------|-----------------------------------------------|------------------------------------|-------------|----------------|-----------------------------|------------|-----------------------------|
| <b>Amino Acid</b>                         | Butanoate metabolism                          | 2-aminobutyrate                    | C02261      | 0.006302       | 2.2005                      | 0.0384     | 1.97±0.29                   |
|                                           | Creatine metabolism                           | creatine                           | C00300      | 6.27E-05       | 4.2029                      | 0.003792   | 0.56±0.03                   |
|                                           | Cysteine, methionine, SAM, taurine metabolism | methionine                         | C00073      | 0.000424       | 3.3727                      | 0.008764   | 1.68±0.12                   |
|                                           | Cysteine, methionine, SAM, taurine metabolism | N-acetylmethionine                 | C02712      | 0.005245       | 2.2803                      | 0.036264   | 2.02±0.23                   |
|                                           | Cysteine, methionine, SAM, taurine metabolism | taurine                            | C00245      | 0.024526       | 1.6104                      | 0.077118   | 0.87±0.04                   |
|                                           | Glutamate metabolism                          | glutamine                          | C00064      | 0.000471       | 3.3272                      | 0.008764   | 0.68±0.03                   |
|                                           | Glutathione metabolism                        | glutathione, oxidized (GSSG)       | C00127      | 0.003743       | 2.4268                      | 0.031233   | 1.23±0.04                   |
|                                           | Glutathione metabolism                        | cysteine-glutathione disulfide     | -           | 0.033147       | 1.4796                      | 0.094372   | 1.59±0.17                   |
|                                           | Glycine, serine and threonine metabolism      | betaine                            | C00719      | 0.00013        | 3.8846                      | 0.006314   | 1.71±0.10                   |
|                                           | Glycine, serine and threonine metabolism      | glycine                            | C00037      | 0.019671       | 1.7062                      | 0.07286    | 1.51±0.15                   |
|                                           | Lysine metabolism                             | pipecolate                         | C00408      | 0.003961       | 2.4022                      | 0.031593   | 1.58±0.13                   |
|                                           | Phenylalanine & tyrosine metabolism           | phenylalanine                      | C00079      | 0.011641       | 1.934                       | 0.054175   | 1.37±0.10                   |
|                                           | Phenylalanine & tyrosine metabolism           | tyrosine                           | C00082      | 0.032599       | 1.4868                      | 0.094372   | 1.41±0.13                   |
|                                           | Polyamine metabolism                          | putrescine                         | C00134      | 0.000227       | 3.6448                      | 0.008764   | 4.49±0.74                   |
|                                           | Polyamine metabolism                          | spermidine                         | C00315      | 0.000537       | 3.2698                      | 0.009288   | 1.76±0.13                   |
|                                           | Tryptophan metabolism                         | C-glycosyltryptophan*              | -           | 0.005634       | 2.2492                      | 0.037172   | 1.53±0.03                   |
|                                           | Tryptophan metabolism                         | tryptophan                         | C00078      | 0.011448       | 1.9413                      | 0.054175   | 1.57±0.18                   |
|                                           | Tryptophan metabolism                         | kynurenine                         | C00328      | 0.013499       | 1.8697                      | 0.061636   | 2.45±0.53                   |
|                                           | Urea cycle; arginine-, proline-, metabolism   | proline                            | C00148      | 0.002061       | 2.6858                      | 0.024611   | 1.83±0.18                   |
|                                           | Urea cycle; arginine-, proline-, metabolism   | citrulline                         | C00327      | 0.004047       | 2.3929                      | 0.031593   | 0.81±0.03                   |
|                                           | Urea cycle; arginine-, proline-, metabolism   | assymetric dimethylarginine (ADMA) | C03626      | 0.009392       | 2.0272                      | 0.050211   | 2.40±0.20                   |
|                                           | Valine, leucine and isoleucine metabolism     | isoleucine                         | C00407      | 0.008556       | 2.0678                      | 0.047409   | 1.40±0.11                   |
|                                           | Valine, leucine and isoleucine metabolism     | valine                             | C00183      | 0.011632       | 1.9343                      | 0.054175   | 1.30±0.08                   |
| Valine, leucine and isoleucine metabolism | leucine                                       | C00123                             | 0.02372     | 1.6249         | 0.077118                    | 1.30±0.08  |                             |
| Valine, leucine and isoleucine metabolism | hydroxyisovaleroyl carnitine                  | -                                  | 0.049576    | 1.3047         | 0.1348                      | 0.78±0.08  |                             |

|                               |                                                              |                                                    |          |          |          |           |           |
|-------------------------------|--------------------------------------------------------------|----------------------------------------------------|----------|----------|----------|-----------|-----------|
| <b>Carbohydrate</b>           | Aminosugars metabolism                                       | erythronate*                                       |          | 0.010644 | 1.9729   | 0.054175  | 1.93±0.27 |
|                               | Fructose, mannose, galactose, starch, and sucrose metabolism | mannitol                                           | C00392   | 0.015945 | 1.7974   | 0.065401  | 0.62±0.06 |
|                               | Glycolysis, gluconeogenesis, pyruvate metabolism             | glycerate                                          | C00258   | 0.020673 | 1.6846   | 0.07286   | 0.76±0.06 |
|                               | Nucleotide sugars, pentose metabolism                        | ribose                                             | C00121   | 0.019995 | 1.6991   | 0.07286   | 0.49±0.10 |
|                               | Nucleotide sugars, pentose metabolism                        | ribulose                                           | C00309   | 0.024108 | 1.6178   | 0.077118  | 0.47±0.10 |
|                               | Nucleotide sugars, pentose metabolism                        | Isobar: ribulose 5-phosphate, xylulose 5-phosphate | -        | 0.025771 | 1.5889   | 0.078943  | 0.50±0.10 |
| <b>Cofactors and Vitamins</b> | Ascorbate and aldarate metabolism                            | ascorbate (Vitamin C)                              | C00072   | 0.002267 | 2.6446   | 0.024933  | 56.5±7.94 |
|                               | Ascorbate and aldarate metabolism                            | glucarate (saccharate)                             | C00818   | 0.021075 | 1.6762   | 0.07286   | 1.81±0.27 |
|                               | Nicotinate and nicotinamide metabolism                       | nicotinamide                                       | C00153   | 0.01152  | 1.9386   | 0.054175  | 0.77±0.03 |
|                               | Pantothenate and CoA metabolism                              | pantothenate                                       | C00864   | 5.18E-05 | 4.2857   | 0.003792  | 0.65±0.02 |
|                               | Riboflavin metabolism                                        | flavin adenine dinucleotide (FAD)                  | C00016   | 0.002136 | 2.6705   | 0.024611  | 0.36±0.06 |
| <b>Energy</b>                 | Krebs cycle                                                  | succinylcarnitine                                  | -        | 0.02041  | 1.6902   | 0.07286   | 0.71±0.05 |
|                               | Krebs cycle                                                  | malate                                             | C00149   | 0.027648 | 1.5583   | 0.083634  | 0.73±0.06 |
|                               | Oxidative phosphorylation                                    | acetylphosphate                                    | C00227   | 0.002605 | 2.5843   | 0.027405  | 0.63±0.04 |
|                               | Oxidative phosphorylation                                    | phosphate                                          | C00009   | 0.018947 | 1.7224   | 0.072782  | 0.83±0.04 |
| <b>Lipid</b>                  | Carnitine metabolism                                         | carnitine                                          | C00487   | 1.05E-05 | 4.98     | 0.002534  | 0.75±0.01 |
|                               | Carnitine metabolism                                         | 2-methylmalonyl carnitine                          | -        | 0.00045  | 3.3472   | 0.008764  | 0.64±0.04 |
|                               | Carnitine metabolism                                         | acetylcarnitine                                    | C02571   | 0.000602 | 3.2201   | 0.009719  | 0.59±0.04 |
|                               | Carnitine metabolism                                         | oleoylcarnitine                                    | -        | 0.021467 | 1.6682   | 0.073168  | 0.14±0.02 |
|                               | Carnitine metabolism                                         | palmitoylcarnitine                                 | C02990   | 0.049172 | 1.3083   | 0.1348    | 0.19±0.03 |
|                               | Fatty acid metabolism (also BCAA metabolism)                 | propionylcarnitine                                 | C03017   | 0.018501 | 1.7328   | 0.072215  | 0.58±0.09 |
|                               | Fatty acid synthesis                                         | malonylcarnitine                                   | -        | 0.000811 | 3.091    | 0.012265  | 0.60±0.05 |
|                               | Fatty acid, monohydroxy                                      | 13-HODE + 9-HODE                                   | -        | 0.000424 | 3.3728   | 0.008764  | 0.42±0.05 |
|                               | Glycerolipid metabolism                                      | choline phosphate                                  | C00588   | 0.003631 | 2.44     | 0.031233  | 0.72±0.05 |
|                               | Glycerolipid metabolism                                      | glycerophosphorylcholine (GPC)                     | C00670   | 0.007965 | 2.0988   | 0.045893  | 3.25±0.62 |
|                               | Glycerolipid metabolism                                      | glycerol                                           | C00116   | 0.035986 | 1.4439   | 0.10126   | 0.81±0.03 |
|                               | Inositol metabolism                                          | scyllo-inositol                                    | C06153   | 0.006347 | 2.1974   | 0.0384    | 1.20±0.04 |
|                               | Long chain fatty acid                                        | eicosenoate (20:1n9 or 11)                         | -        | 0.00337  | 2.4724   | 0.031233  | 0.49±0.07 |
| Long chain fatty acid         | myristoleate (14:1n5)                                        | C08322                                             | 0.006136 | 2.2121   | 0.0384   | 0.59±0.07 |           |
| Long chain fatty acid         | pentadecanoate (15:0)                                        | C16537                                             | 0.014018 | 1.8533   | 0.062822 | 0.68±0.06 |           |
| Long chain fatty acid         | arachidate (20:0)                                            | C06425                                             | 0.014839 | 1.8286   | 0.064127 | 0.56±0.09 |           |
| Long chain fatty acid         | nonadecanoate (19:0)                                         | C16535                                             | 0.01981  | 1.7031   | 0.07286  | 0.54±0.11 |           |

|                                          |                                                      |                                      |          |          |          |           |           |
|------------------------------------------|------------------------------------------------------|--------------------------------------|----------|----------|----------|-----------|-----------|
|                                          | Long chain fatty acid                                | dihomo-linoleate (20:2n6)            | C16525   | 0.020904 | 1.6798   | 0.07286   | 0.64±0.07 |
|                                          | Long chain fatty acid                                | 10-nonadecenoate (19:1n9)            | -        | 0.022333 | 1.651    | 0.075065  | 0.66±0.07 |
|                                          | Long chain fatty acid                                | margarate (17:0)                     | -        | 0.024677 | 1.6077   | 0.077118  | 0.60±0.10 |
|                                          | Long chain fatty acid                                | 10-heptadecenoate (17:1n7)           | -        | 0.024856 | 1.6046   | 0.077118  | 0.72±0.06 |
|                                          | Long chain fatty acid                                | stearidonate (18:4n3)                | C16300   | 0.032957 | 1.4821   | 0.094372  | 0.62±0.09 |
|                                          | Long chain fatty acid                                | linoleate (18:2n6)                   | C01595   | 0.039169 | 1.4071   | 0.10895   | 0.76±0.06 |
|                                          | Lysolipid                                            | 1-oleoylglycerophosphoethanolamine   | -        | 0.004674 | 2.3304   | 0.034272  | 0.54±0.03 |
|                                          | Lysolipid                                            | 1-stearoylglycerophosphocholine      | -        | 0.005683 | 2.2454   | 0.037172  | 0.15±0.06 |
|                                          | Lysolipid                                            | 1-stearoylglycerophosphoinositol     | -        | 0.011635 | 1.9342   | 0.054175  | 0.62±0.08 |
|                                          | Lysolipid                                            | 1-palmitoylglycerophosphocholine     | -        | 0.015653 | 1.8054   | 0.065312  | 0.37±0.09 |
|                                          | Lysolipid                                            | 1-oleoylglycerophosphocholine        | -        | 0.031837 | 1.4971   | 0.093957  | 0.33±0.09 |
|                                          | Medium chain fatty acid                              | caproate (6:0)                       | C01585   | 5.59E-05 | 4.2525   | 0.003792  | 0.20±0.03 |
|                                          | Medium chain fatty acid                              | pelargonate (9:0)                    | C01601   | 0.006852 | 2.1642   | 0.040445  | 0.76±0.04 |
|                                          | Monoacylglycerol                                     | 1-palmitoylglycerol (1-monopalmitin) | -        | 0.024479 | 1.6112   | 0.077118  | 0.63±0.09 |
|                                          | Sphingolipid                                         | stearoyl sphingomyelin               | C00550   | 0.003605 | 2.4431   | 0.031233  | 0.40±0.07 |
|                                          | Sterol/Steroid                                       | 7-beta-hydroxycholesterol            | C03594   | 0.000336 | 3.4743   | 0.008764  | 0.43±0.02 |
| <b>Nucleotide</b>                        | Purine and pyrimidine metabolism                     | methylphosphate                      | -        | 0.00862  | 2.0645   | 0.047409  | 0.41±0.08 |
|                                          | Purine metabolism, (hypo)xanthine/inosine containing | inosine                              | C00294   | 0.004462 | 2.3505   | 0.033742  | 0.53±0.07 |
|                                          | Purine metabolism, (hypo)xanthine/inosine containing | inosine 5'-monophosphate (IMP)       | C00130   | 0.031247 | 1.5052   | 0.093354  | 0.49±0.12 |
|                                          | Purine metabolism, adenine containing                | adenosine 3',5'-diphosphate          | C00054   | 0.001872 | 2.7278   | 0.023837  | 0.39±0.05 |
|                                          | Purine metabolism, adenine containing                | adenosine                            | C00212   | 0.009544 | 2.0203   | 0.050211  | 0.32±0.03 |
|                                          | Purine metabolism, adenine containing                | adenosine 5'-diphosphate (ADP)       | C00008   | 0.015578 | 1.8075   | 0.065312  | 0.19±0.02 |
|                                          | Purine metabolism, adenine containing                | adenosine 5'-monophosphate (AMP)     | C00020   | 0.017356 | 1.7606   | 0.070001  | 0.57±0.09 |
|                                          | Pyrimidine metabolism, cytidine containing           | cytidine                             | C00475   | 0.000366 | 3.436    | 0.008764  | 1.35±0.05 |
| Pyrimidine metabolism, uracil containing | uracil                                               | C00106                               | 0.003286 | 2.4834   | 0.031233 | 1.73±0.18 |           |
| Pyrimidine metabolism, uracil containing | uridine 5'-monophosphate (UMP)                       | C00105                               | 0.005036 | 2.2979   | 0.035845 | 1.98±0.28 |           |
| <b>Peptide</b>                           | Dipeptide                                            | pro-hydroxy-pro                      | -        | 0.000318 | 3.4973   | 0.008764  | 2.52±0.22 |
|                                          | gamma-glutamyl                                       | gamma-glutamylglutamate              | -        | 0.003368 | 2.4727   | 0.031233  | 2.23±0.14 |



|                    |                      |                       |        |          |        |          |           |
|--------------------|----------------------|-----------------------|--------|----------|--------|----------|-----------|
| <b>Xenobiotics</b> | Food component/Plant | ergothioneine         | C05570 | 0.001799 | 2.7449 | 0.023837 | 5.29±1.19 |
|                    | Food component/Plant | N-glycolylneuraminate | C03410 | 0.018037 | 1.7438 | 0.071558 | 2.16±0.40 |

Wild-type C57BL/6J mice were subjected to sham surgery or myocardial infarction (MI) for 5 d. Metabolites extracted from the hearts were then subjected to LC or GC mass spectrometric analysis. To eliminate potential bias imposed by data imputation, only those metabolites that had 3 or more samples represented in each sham and MI group are listed above. Metabolites found to be significantly different (i.e.,  $p < 0.05$ ) by unpaired Student's *t*-test are shown. The (-) indicates no KEGG identification number.
